# Supplementary material for: Burkholderia pseudomallei Known Siderophores and Hemin Uptake Are Dispensable for Lethal Murine Melioidosis
Source: PLoS Negl Trop Dis. 2012 Jun 26;6(6):e1715. doi: 10.1371/journal.pntd.0001715 (PMC3383733; doi:10.1371/journal.pntd.0001715)
Supplement: Text S1 — (DOC) [file pntd.0001715.s003.doc]

**Supplementary Materials**

**Strain Construction**

**Bp327.** DNA fragments corresponding to 1.15-kb upstream sequences of *mbaS* and 0.85-kb downstream sequences of *mbaF* were PCR-amplified from 1710b genomic DNA using primers 1968+1963 and 1970+1971 (oligonucleotides used in this study are listed in **Table S1**), respectively, and cloned into the TA-cloning vector pCR2.1 (plasmids used in this study are listed in **Table S2**). The upstream and downstream DNA fragments were released from the corresponding pCR2.1 constructs by digestion with *Hin*dIII+*Spe*I and *Hin*dIII+*Eco*RI, respectively, ligated with T4 DNA ligase, and re-digested with *Eco*RI. The resulting 2-kb product was cloned into the *Eco*RI site of pEXKm4. Next, the 1.5-kb *FRT*-*npt*II-*FRT* *Hin*dIII fragment from pFKM2 containing the KmR marker was ligated into the central *Hin*dIII site between the upstream and downstream segments to create pEXKm4ΔMBA::FRTKm. This plasmid was conjugated into 1710b and KmR merodiploids were selected. Transformation of a merodiploid isolate with pBADSce, followed by arabinose induction of I-*Sce*I counter-selection, selection of KmR colonies, and pBADSce curing resulted in a ΔMBA::*FRT*-KmR-*FRT* mutant. The KmR marker was then removed using Flp recombinase following a previously described protocol . The presence of the desired deletion in the resulting strain Bp327 was confirmed by Southern blot analysis using *Eco*RI-digested chromosomal DNA and the 1.15-kb upstream flanking DNA fragment as the probe.

**Bp338**. The 2.3-kb *Xho*I fragment carrying the 141-kb deletion junction from pCC1FOS-708a-6 was cloned into pWSK29 . pWSK29::141 was digested with *Fse*I to remove a 0.5-kb central portion, blunt-ended with T4 polymerase and ligated with the 1.5-kb *FRT*-*npt*II-*FRT* *Sma*I fragment from pFKM2 containing the KmR marker. The 3.3-kb marked deletion was sub-cloned on a *Xho*I fragment into pEXGm5B digested with the same enzyme to create pEXGm5141::FRTKm. This plasmid was conjugally transferred into strain Bp74 and merodiploids were selected on Gm+Km+Zeo+X-gluc-containing plates. Sucrose counter-selection in the presence of kanamycin was performed to obtain a 141::FRTKm mutant. White colonies were then tested for GmS, KmR and ZeoS. The KmR marker was then removed using Flp recombinase following a previously described protocol . The presence of the desired deletion in the resulting strain Bp338 was confirmed by Southern blot analysis using *Sca*I-digested chromosomal DNA and the 2.3-kb deletion junction-containing DNA fragment as the probe.

**Bp416.** A 1.9-kb fragment of *fptA* was PCR-amplified from 1710b genomic DNA with primers 2069 and 2070, and cloned into pGEM®-T Easy. The resulting pGEM®-T Easy*fptA* was then digested with *Bsi*WI to remove a 0.67-kb central DNA fragment, followed by religation*.* The 1.3-kb Δ*fptA* fragment was then rescued by *Eco*RI digestion and cloned into pEXKm5 to create pEXKm5Δ*fptA.* This plasmid was transferred to Bp338 by conjugation, merodiploid exconjugants were selected on Km-containing medium, followed by sucrose counter-selection to resolve the merodiploid and recover the Δ*fptA* mutant. White colonies were patched for KmS. The presence of the Δ*fptA* allele was confirmed by PCR-amplification of the deletion-containing region from Bp416 chromosomal DNA with primers 2090 and 2091, followed by sequencing using the same primers.

**Bp447, Bp448 and Bp449.** Two fragments of 0.75-kb and 0.5-kb corresponding to the 3’ and 5’ regions of *pchA* were PCR-amplified from 1710b genomic DNA with primers 2079+2080 and 2081+2082, respectively, and into pCR2.1. The DNA fragments corresponding to the left and right flanking regions were released from pCR2.1 by *Hin*dIII+*Eco*RI and *Hin*dIII+*Spe*I digestion, respectively, ligated with T4 polymerase and re-digested with *Eco*RI. The resulting 1.25-kb DNA fragment was cloned into the *Eco*RI site of pEXGm5B. The ensuing plasmid was digested with *Hin*dIII and ligated with the 1.5-kb *FRT*-*npt*II-*FRT* *Hin*dIII fragment from pFKM2 containing the KmR marker to create pEXGm5Δ*pchA*::FRTKm. This plasmid was transferred to 1710b, Bp327 and Bp338 by conjugation and merodiploids were selected on Km-containing LB plates. Transformation of merodiploid isolates with pBADSce, followed by simultaneous sucrose counter-slection, arabinose induction of I-*Sce*I counter-selection, selection of KmR colonies, and pBADSce curing resulted in the respective Δ*pchA*::FRTKm mutant derivatives. The KmR marker was removed using Flp recombinase . The presence of the mutation in the strains Bp447, Bp448 and Bp449 was confirmed by Southern blot analysis of EcoRI digests of the respective chromosomal DNAs using the 0.5-kb *pchA* 5’ DNA fragment as the probe.

**Bp486 and Bp487.** A 0.85-kb *pchC*  fragment was PCR amplified from 1710b genomic DNA with primers 2152+2153 and cloned into pCR2.1. The 0.75-kb *pchA* 3’ and 0.85-kb *pchC* fragments were released from the resulting pCR2.1 clones by digestion with *Hin*dIII+*Spe*I and *Hin*dIII+*Eco*RI, respectively, ligated with T4 polymerase, and re-digested with EcoRI. The ensuing 1.6-kb DNA fragment was cloned into the *Eco*RI site of pEXGm5B. The 1.5-kb *FRT*-*npt*II-*FRT* *Hin*dIII fragment from pFKM2 containing the KmR marker was ligated into the central HindIII between the 5’ and 3’ *pchBA* flanking fragments to create pEXGm5Δ*pchBA*::FRTKm. This plasmid was transferred to 1710b and Bp338 by conjugation and merodiploids selected on Km-containing LB plates. Sucrose counter-selection and selection for KmR yielded the respective Δ*pchBA*::FRTKm mutant derivatives of 1710b (Bp486) and Bp338 (Bp487). Bp487 candidates were also identified by their GmS phenotypes. The presence of the correct deletions in the mutant strains was confirmed by PCR with primers 1656+2214, 1597+2214, 1656+2130, and 2212+2213, followed by sequencing of the resulting PCR fragment with primer 2130.

**Bp515 and Bp516.** A 0.85-kb *fptA* 3’ fragmentwas PCR-amplified from 1710b genomic DNA with primers 2215+2070 and cloned into pCR2.1. The 0.75-kb *pchA* 3’ fragment (obtained during construction of Bp447) and 0.85-kb *fptA* 3’ were released from the resulting pCR2.1 constructs by digestion with *Hin*dIII+*Spe*I and *Hin*dIII+*Eco*RI, respectively, ligated with T4 polymerase and re-digested with *Eco*RI. The ensuing 1.6-kb DNA fragment was cloned into the *Eco*RI site of pEXGm5B. The 1.5-kb *FRT*-*npt*II-*FRT* *Hin*dIII fragment from pFKM2 containing the KmR marker was ligated into the central HindIII between the *pchA* and *ftpA* flanking fragments to create to create pEXGm5ΔPCH::FRTKm. This plasmid was transferred to 1710b and Bp338 by conjugation and merodiploids selected on Km-containing LB plates. Sucrose counter-selection in the presence of Km yielded the respective ΔPCH::FRTKm mutants. Bp516 mutant candidates were also identified by their GmS phenotypes. The KmR marker was then removed using Flp recombinase following a previously described protocol . The presence of the correct deletion in mutant strains was confirmed by PCR with primers 536+537, 1655+2070, and 2212+2213, followed by sequencing of the resulting PCR fragment with primer 2130.

**Bp549.** Two DNA fragments of 0.8-kb and 0.6-kb corresponding to the left and right flanking regions of the HMU locus as depicted in Fig. 4 were PCR-amplified from 1710b genomic DNA with primers 2273+2274 and 2275+2276, respectively, and cloned into pCR2.1. The DNA fragments corresponding to the left and right HMU flanking regions were released from the resulting pCR2.1 clones by digestion with *Hin*dIII+*Eco*RV and *Hin*dIII+*Eco*RI, respectively, ligated with T4 polymerase and then re-digested with EcoRI. The ensuing 1.4-kb product was cloned into the *Eco*RI site of pEXGm5B. The 1.5-kb *FRT*-*npt*II-*FRT* *Hin*dIII fragment from pFKM2 containing the KmR marker was ligated into the central *Hin*dIII site between the two HMU flanking regions to create pEXGm5ΔHMU::FRTKm. This plasmid was transferred to Bp516 by conjugation and merodiplids selected on LB plates containing Km. Sucrose counter-selection in the presence of Kmand X-gluc resulted in a ΔHMU::FRTKm mutant. White colonies were tested for their KmR GmS phenotypes, followed by removal of the KmR marker using Flp recombinase . The correct mutant genotype was confirmed by PCR with primers 2297+2213 and 2296+2297, followed by sequencing of the resulting PCR fragment with primer 2296.

**Bp568.** Two DNA fragments of 1.1-kb and 0.85-kb corresponding to the left and right flanking regions of the HEM locus as depicted in Fig. 4 were PCR amplified from 1710b genomic DNA with primers 2304+2305 and 2300+2301, respectively, and cloned into pCR2.1. The DNA fragments corresponding to the left and right HEM flanking regions were released from the resulting pCR2.1 constructs by digestion with *Hin*dIII+*Spe*I and *Hin*dIII+*Eco*RI, respectively, ligated with T4 polymerase and re-digested with *Eco*RI. The ensuing 1.95-kb DNA fragment was then cloned into the *Eco*RI site of pEXGm5B. The 1.5-kb *FRT*-*npt*II-*FRT* *Hin*dIII fragment from pFKM4 containing the KmR marker was ligated into the central *Hin*dIII site between the two HEM flanking regions to create pEXGm5ΔHEM::FRTKm. This plasmid was transferred to Bp549 by conjugation and merodiploids selected on LB plates containing Km+Gm. Sucrose counter-selection on Km-containing medium yielded the ΔHEM::FRTKm mutant. White colonies were tested for KmR GmS phenotypes, followed by removal of the KmR marker using Flp recombinase . The HEM deletion genotype was confirmed by PCR with 1) primers 2213+2332, followed by sequencing with primer 2213, and 2) primers 2331+2332, followed by sequencing with primer 2331.

**References**

1. Lopez CM, Rholl DA, Trunck LA, Schweizer HP (2009) Versatile dual-technology system for markerless allele replacement in *Burkholderia pseudomallei*. Appl Environ Microbiol 75: 6496-6503.

2. Choi K-H, Mima T, Casart Y, Rholl D, Kumar A, et al. (2008) Genetic tools for select agent compliant manipulation of *Burkholderia pseudomallei*. Appl Env Microbiol 74: 1064-1075.

3. Trunck LA, Propst KL, Wuthiekanun V, Tuanyok A, Beckstrom-Sternberg SM, et al. (2009) Molecular basis of rare aminoglycoside susceptibility and pathogenesis of *Burkholderia pseudomallei* clinical isolates from Thailand. PLoS Negl Trop Dis 3: e0000519.

4. Wang RF, Kushner SR (1991) Construction of versatile low-copy-number vectors for cloning, sequencing and gene expression in *Escherichia coli*. Gene 100: 195-199.
